# Supplementary material
Source: PubMed Central journal article supplement (PMC5572771)
Supplement: NIHMS893656-supplement-Suppl.pdf [file NIHMS893656-supplement-Suppl.pdf]

## **Journal**

Clinical Pharmacokinetics

## **Title**

Neonatal Maturation of Paracetamol (Acetaminophen) Glucuronidation, Sulfation, and Oxidation Based on a Parent–Metabolite Population Pharmacokinetic Model

## **Authors and affiliations**

Sarah F. Cook<sup>1</sup>, Chris Stockmann<sup>2,3</sup>, Samira Samiee-Zafarghandy<sup>4,5</sup>, Amber D. King<sup>1</sup>, Nina Deutsch<sup>6</sup>, Elaine F. Williams<sup>4</sup>, Diana G. Wilkins<sup>1,7</sup>, Catherine M. T. Sherwin<sup>2,3,8</sup>, John N. van den Anker<sup>4,9,10,11</sup>

<sup>1</sup> Center for Human Toxicology, Department of Pharmacology and Toxicology, University of Utah, Salt Lake City, UT, USA

<sup>2</sup> Division of Clinical Pharmacology, Department of Pediatrics, University of Utah School of Medicine, Salt Lake City, UT, USA

<sup>3</sup> Department of Pharmacology and Toxicology, University of Utah, Salt Lake City, UT, USA

<sup>4</sup> Division of Clinical Pharmacology, Children’s National Health System, Washington, DC, USA

<sup>5</sup> Division of Neonatology, Department of Pediatrics, McMaster University, Hamilton, ON, Canada

<sup>6</sup> Division of Anesthesiology, Sedation, and Perioperative Medicine, Children's National Health System, Washington, DC, USA

<sup>7</sup> Division of Medical Laboratory Sciences, Department of Pathology, University of Utah School of Medicine, Salt Lake City, UT, USA

<sup>8</sup> Clinical Trials Office, Department of Pediatrics, University of Utah School of Medicine, Salt Lake City, UT, USA

<sup>9</sup> Departments of Pediatrics, Integrative Systems Biology, Pharmacology and Physiology, George Washington University School of Medicine and Health Sciences, Washington, DC, USA

<sup>10</sup> Intensive Care and Department of Pediatric Surgery, Erasmus Medical Center–Sophia Children’s Hospital, Rotterdam, The Netherlands

<sup>11</sup> Department of Paediatric Pharmacology, University Children’s Hospital Basel, Basel, Switzerland

## **Corresponding author**

Catherine M. T. Sherwin

E-mail: catherine.sherwin@hsc.utah.edu

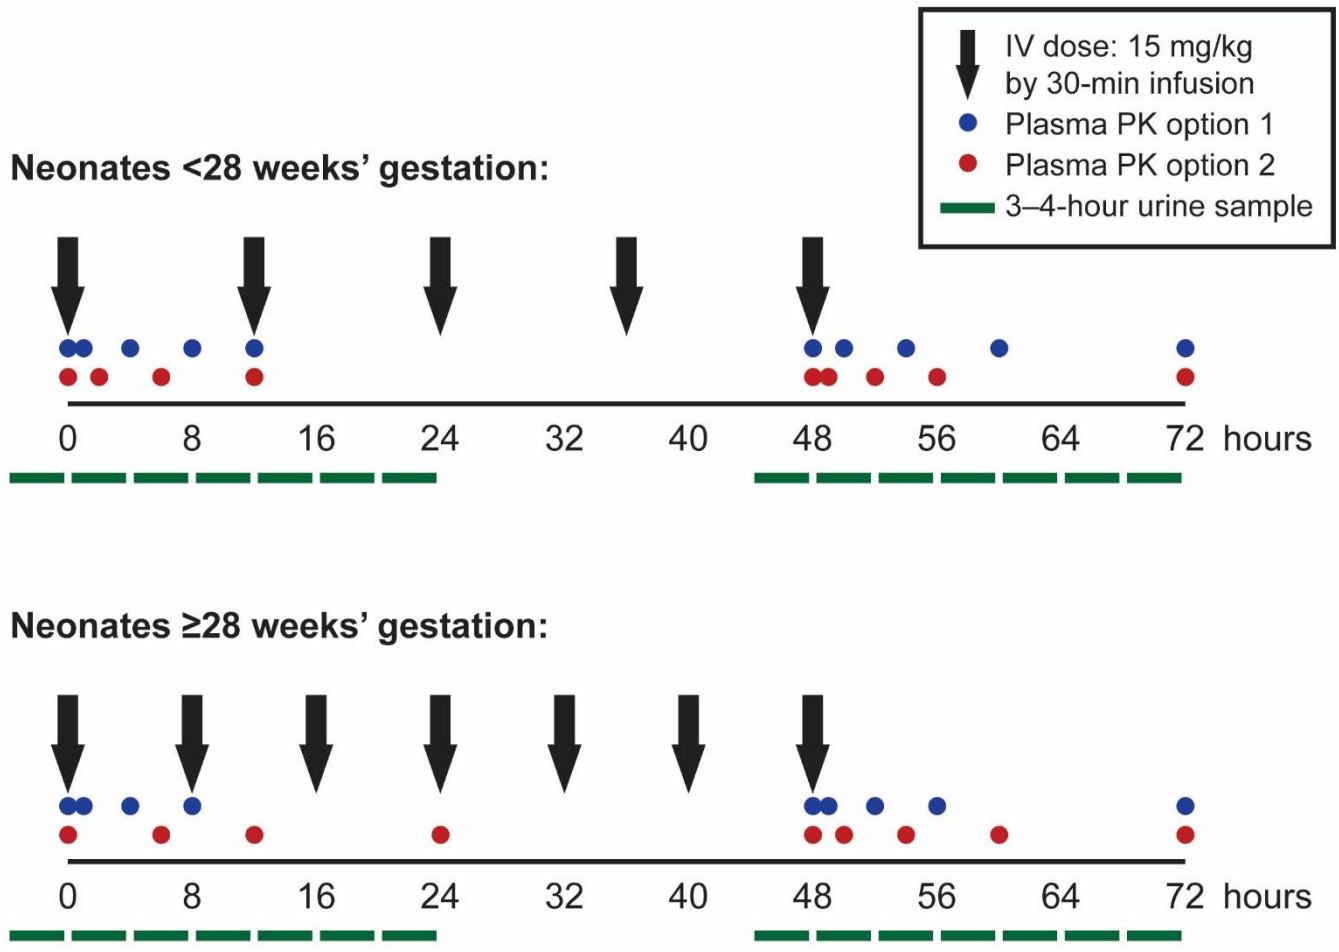

**Fig. S1** Dosing and pharmacokinetic sampling schemes. Neonates <28 weeks' gestation received five doses at 12-h intervals; neonates  $\geq 28$  weeks' gestation received seven doses at 8-h intervals. Patients were randomly assigned to one of two plasma sampling schedules, each consisting of 9–10 collection times.

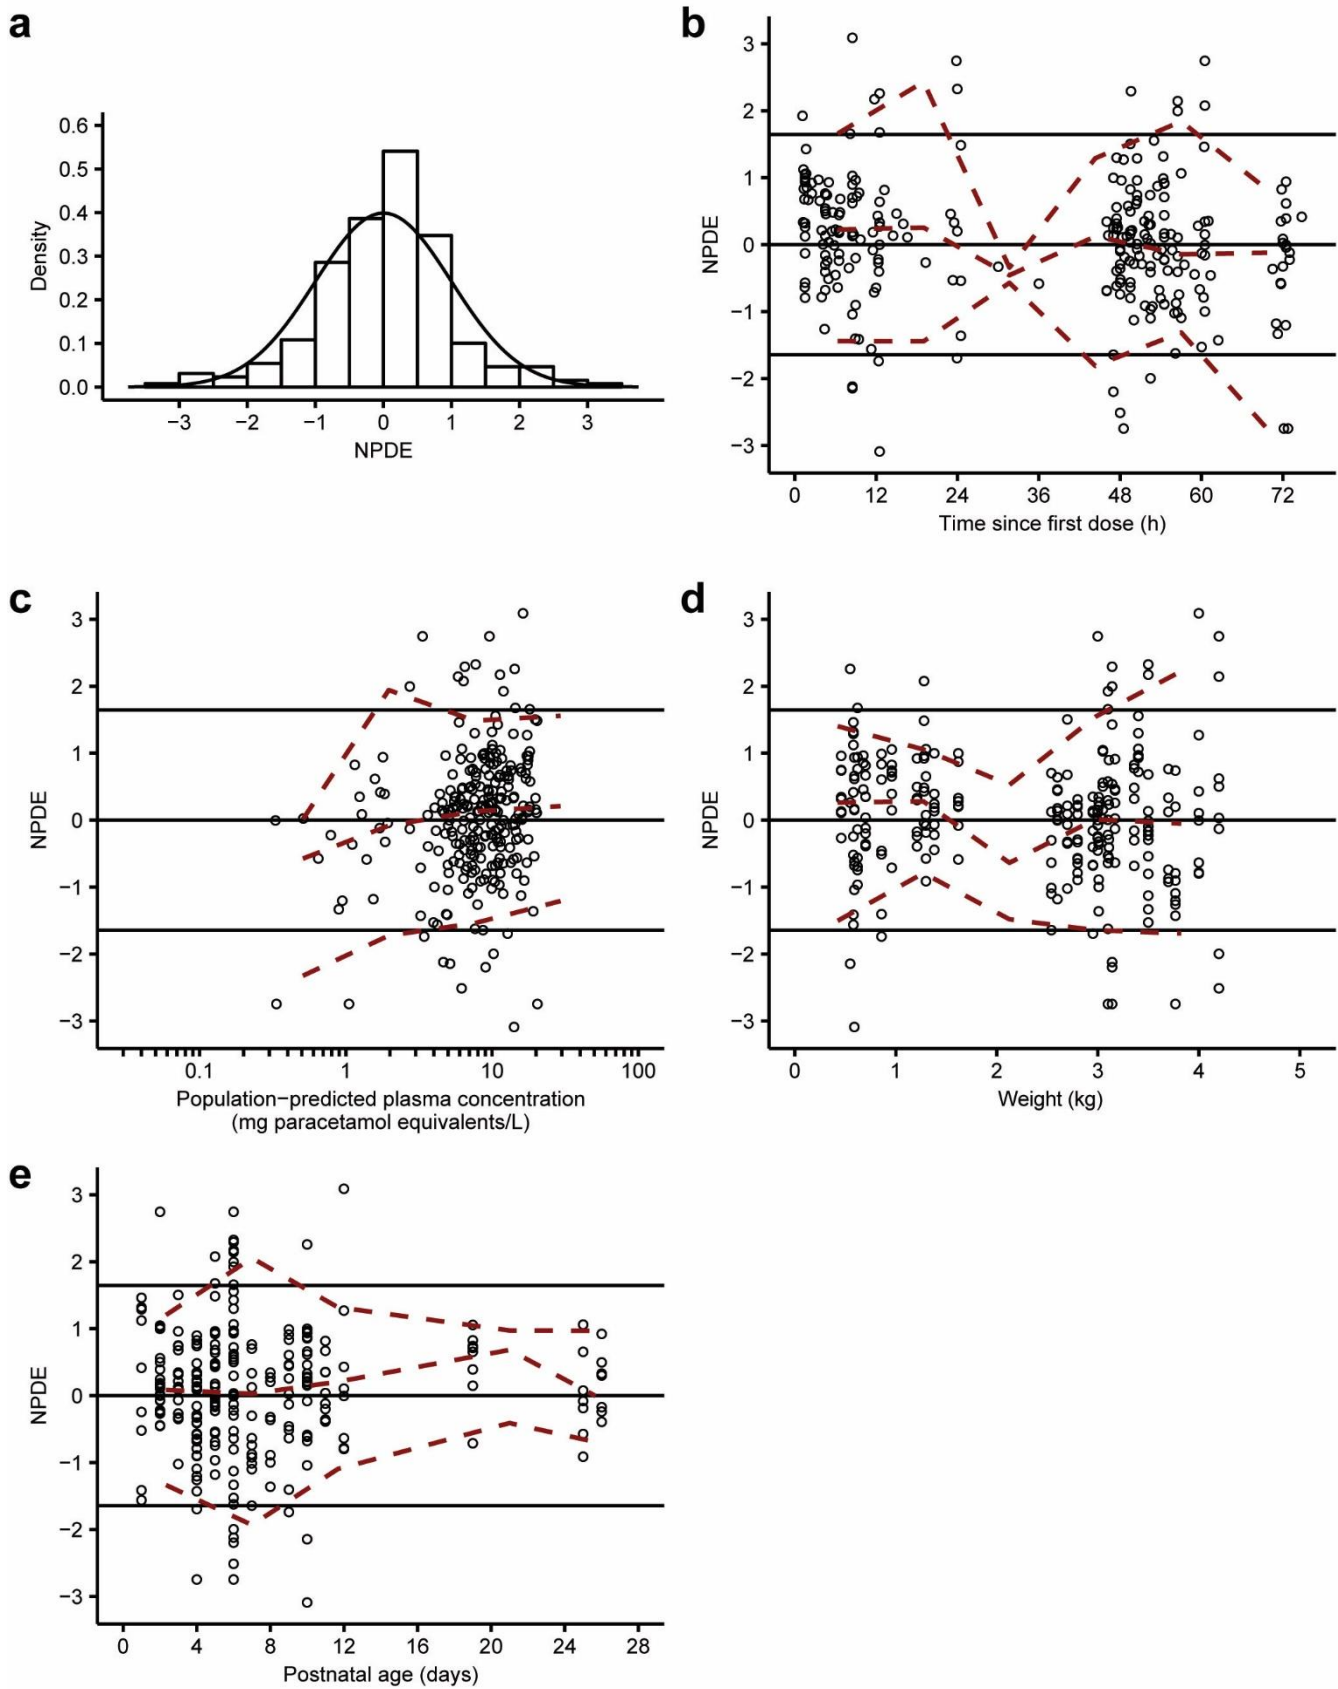

**Fig. S2** Plots of plasma paracetamol NPDEs for evaluation of the final model. Density histogram of NPDEs (a) with overlaid *solid black curve* depicting the standard normal distribution. NPDEs versus **b** time since first dose, **c** population-predicted concentration, **d** weight, and **e** postnatal age. In **b–e**, the *dashed red lines* depict the 5th, 50th, and 95th percentiles of the NPDEs and the *solid black lines* depict the 5th, 50th, and 95th percentiles of the standard normal distribution. *NPDEs* normalized prediction distribution errors

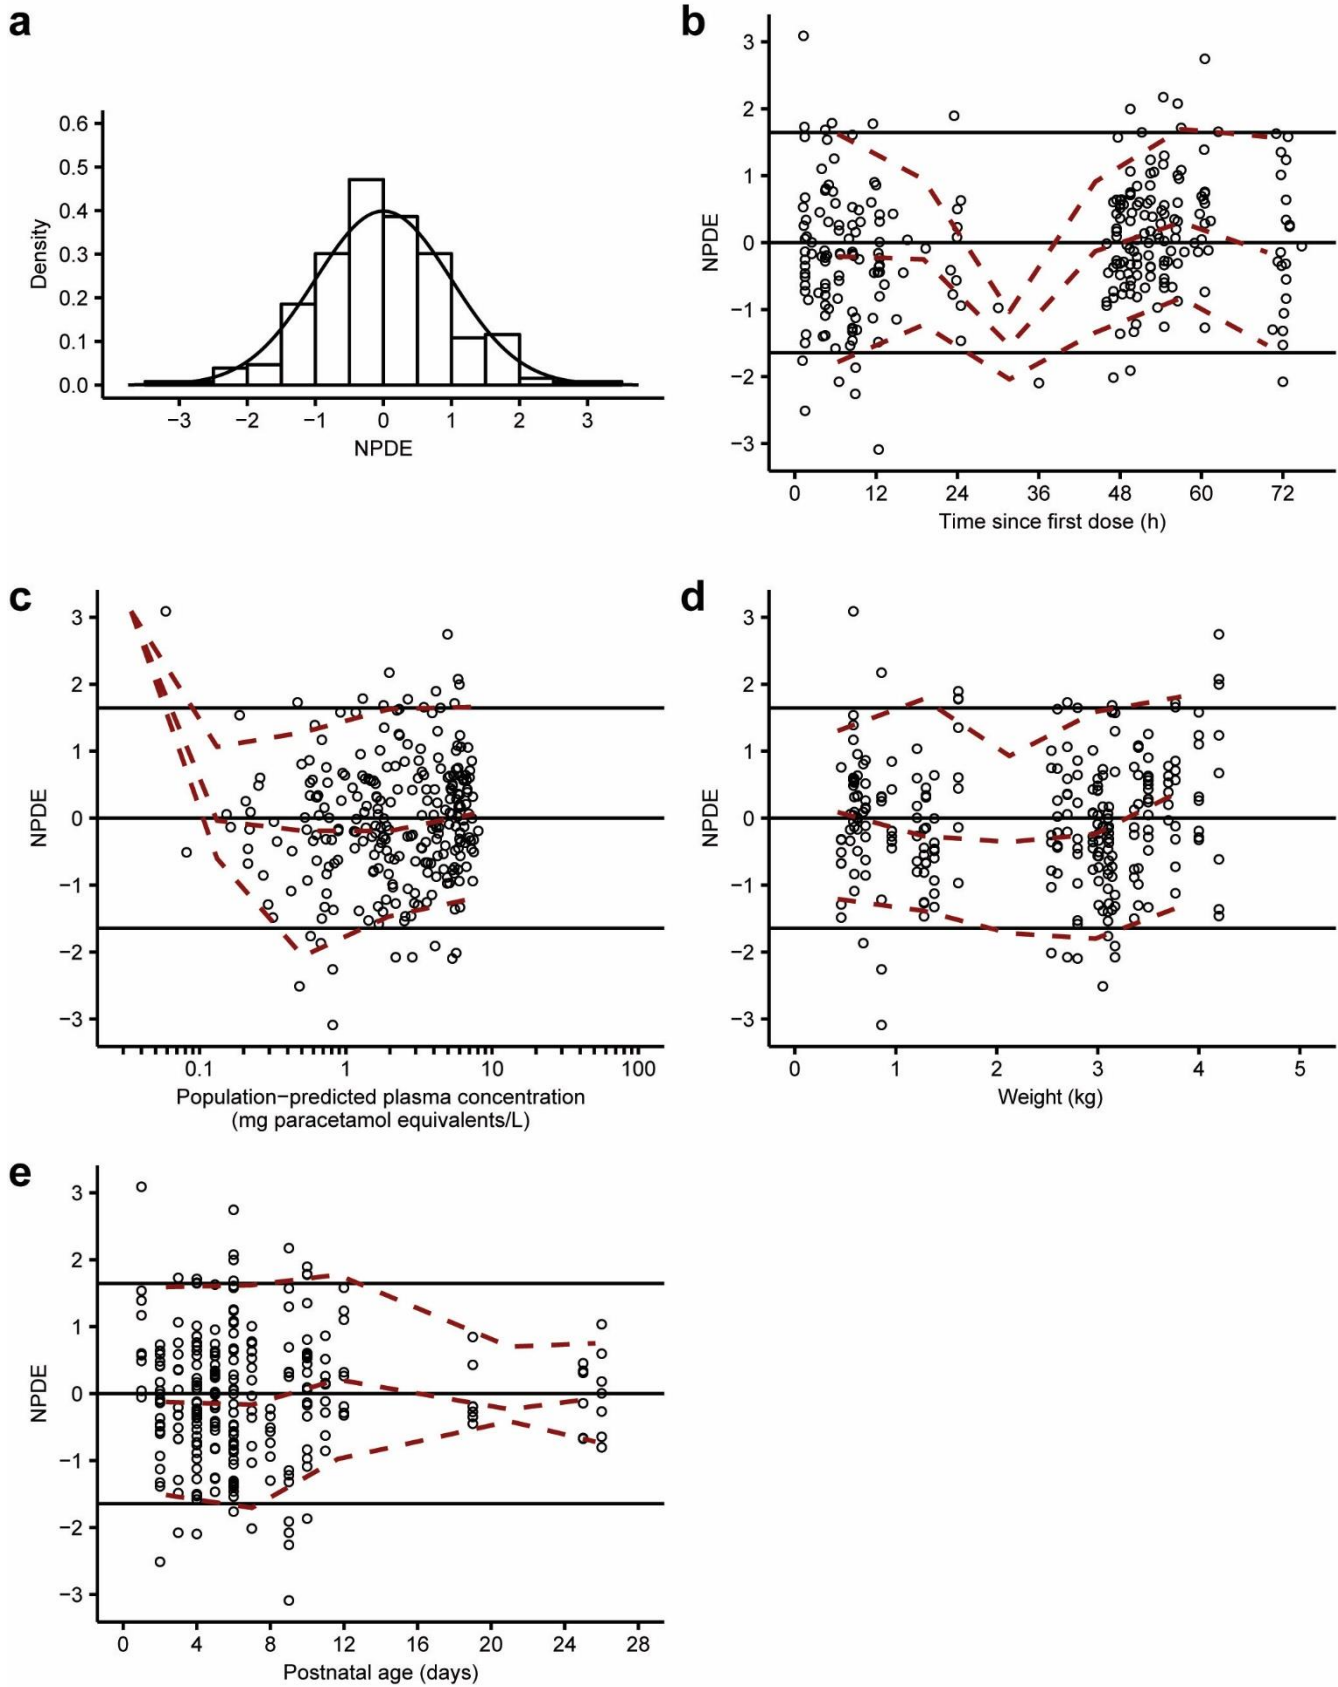

**Fig. S3** Plots of plasma paracetamol-glucuronide NPDEs for evaluation of the final model. Density histogram of NPDEs (a) with overlaid *solid black curve* depicting the standard normal distribution. NPDEs versus **b** time since first dose, **c** population-predicted concentration, **d** weight, and **e** postnatal age. In **b–e**, the *dashed red lines* depict the 5th, 50th, and 95th percentiles of the NPDEs and the *solid black lines* depict the 5th, 50th, and 95th percentiles of the standard normal distribution. *NPDEs* normalized prediction distribution errors

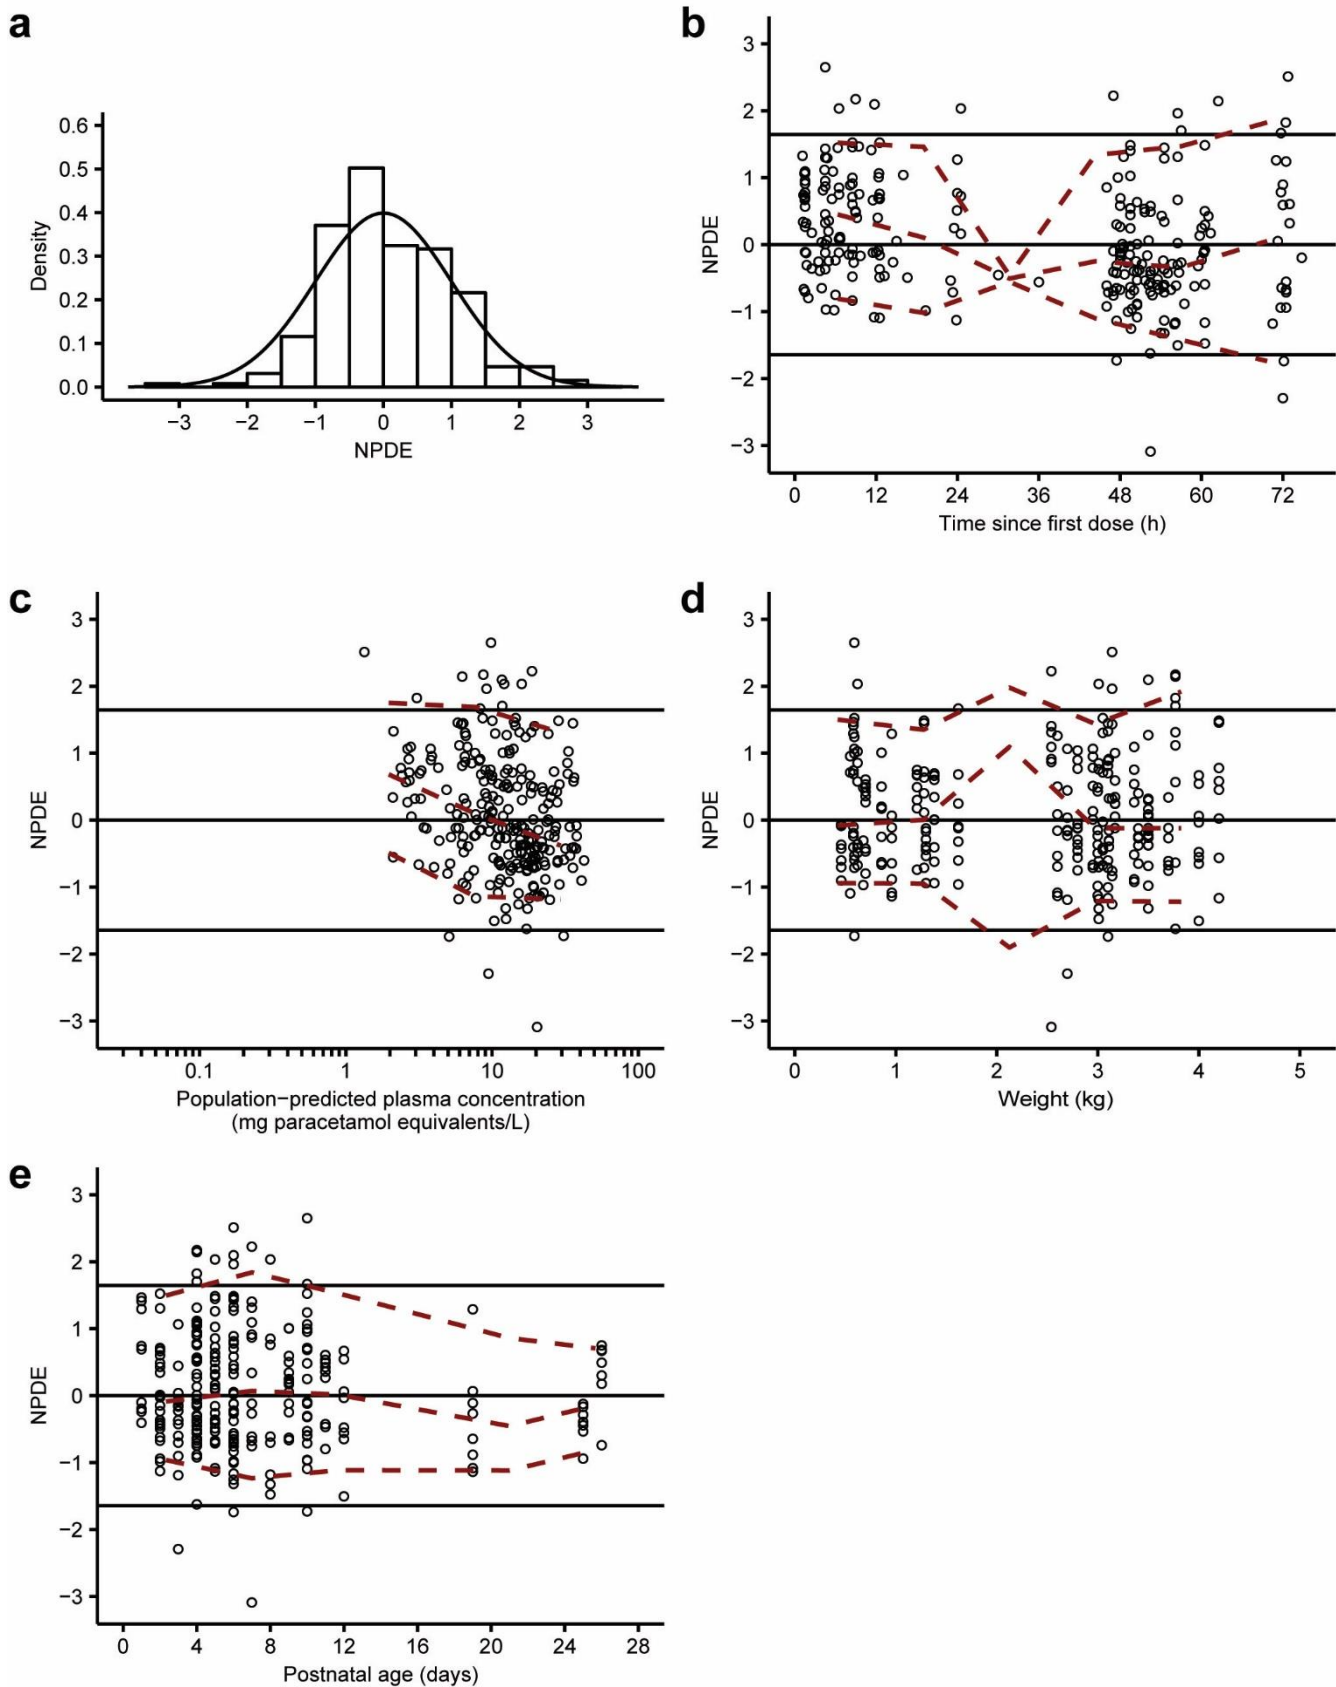

**Fig. S4** Plots of plasma paracetamol-sulfate NPDEs for evaluation of the final model. Density histogram of NPDEs (a) with overlaid *solid black curve* depicting the standard normal distribution. NPDEs versus **b** time since first dose, **c** population-predicted concentration, **d** weight, and **e** postnatal age. In **b–e**, the *dashed red lines* depict the 5th, 50th, and 95th percentiles of the NPDEs and the *solid black lines* depict the 5th, 50th, and 95th percentiles of the standard normal distribution. *NPDEs* normalized prediction distribution errors

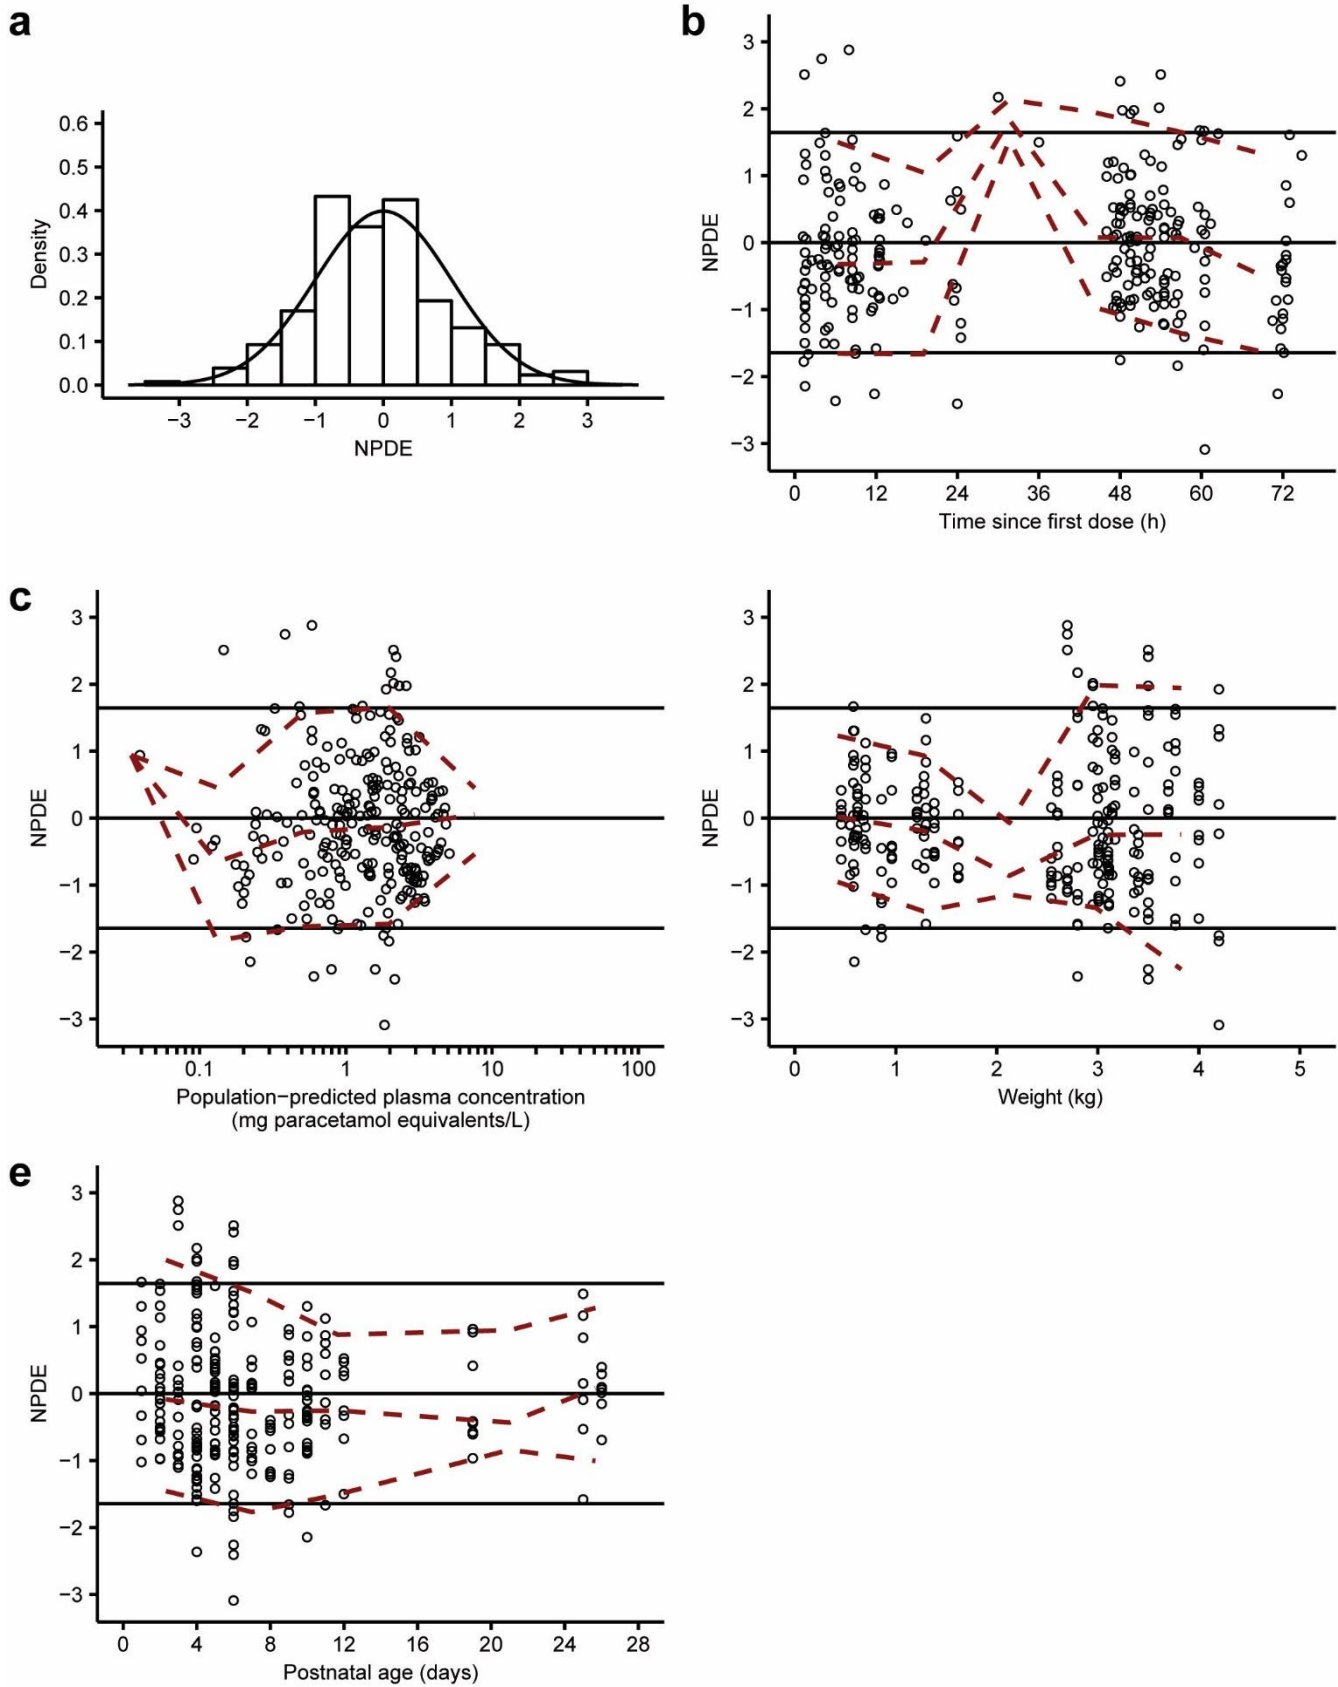

**Fig. S5** Plots of plasma oxidative pathway metabolite NPDEs for evaluation of the final model. Density histogram of NPDEs (a) with overlaid *solid black curve* depicting the standard normal distribution. NPDEs versus **b** time since first dose, **c** population-predicted concentration, **d** weight, and **e** postnatal age. In **b–e**, the *dashed red lines* depict the 5th, 50th, and 95th percentiles of the NPDEs and the *solid black lines* depict the 5th, 50th, and 95th percentiles of the standard normal distribution. *NPDEs* normalized prediction distribution errors

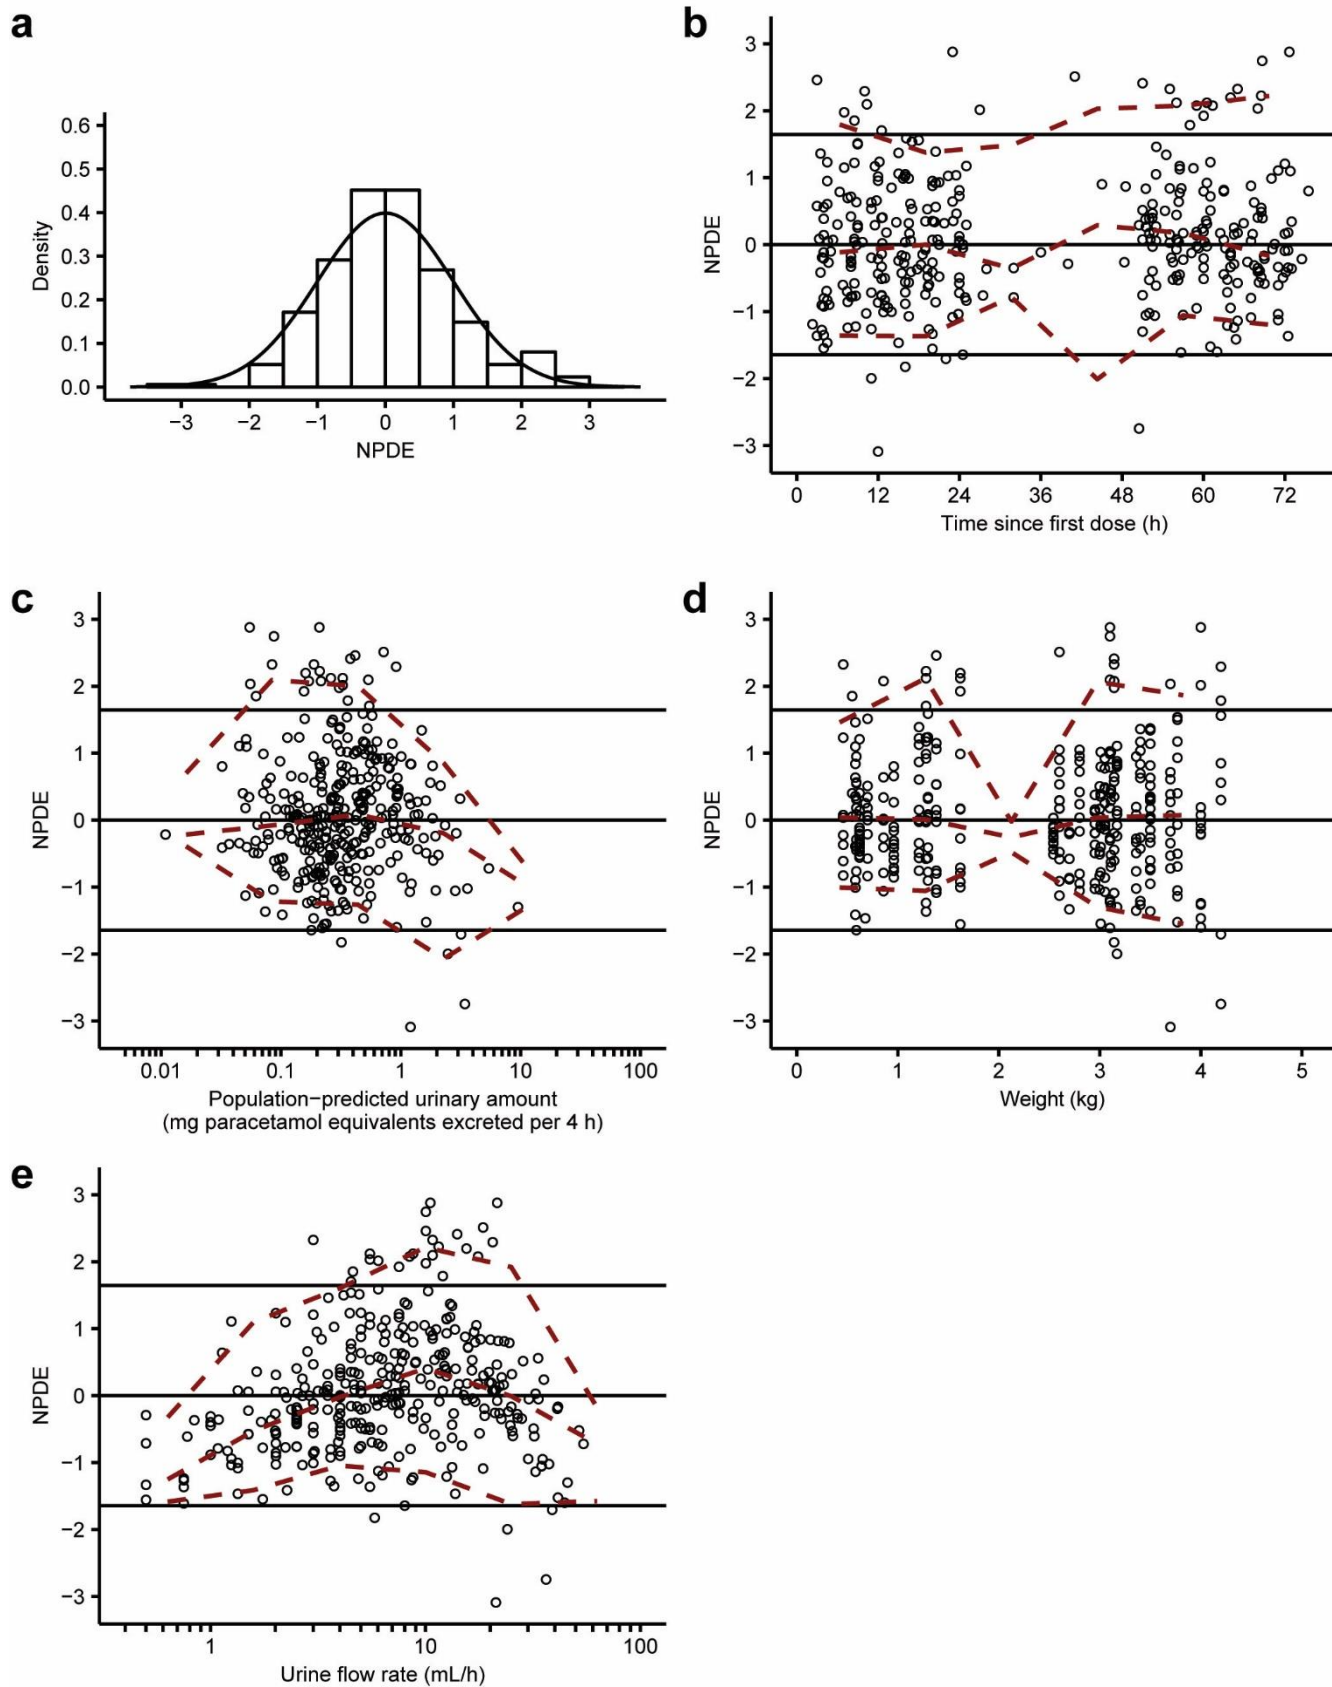

**Fig. S6** Plots of urinary paracetamol NPDEs for evaluation of the final model. Density histogram of NPDEs (a) with overlaid *solid black curve* depicting the standard normal distribution. NPDEs versus **b** time since first dose, **c** population-predicted amount, **d** weight, and **e** urine flow rate. In **b–e**, the *dashed red lines* depict the 5th, 50th, and 95th percentiles of the NPDEs and the *solid black lines* depict the 5th, 50th, and 95th percentiles of the standard normal distribution. *NPDEs* normalized prediction distribution errors

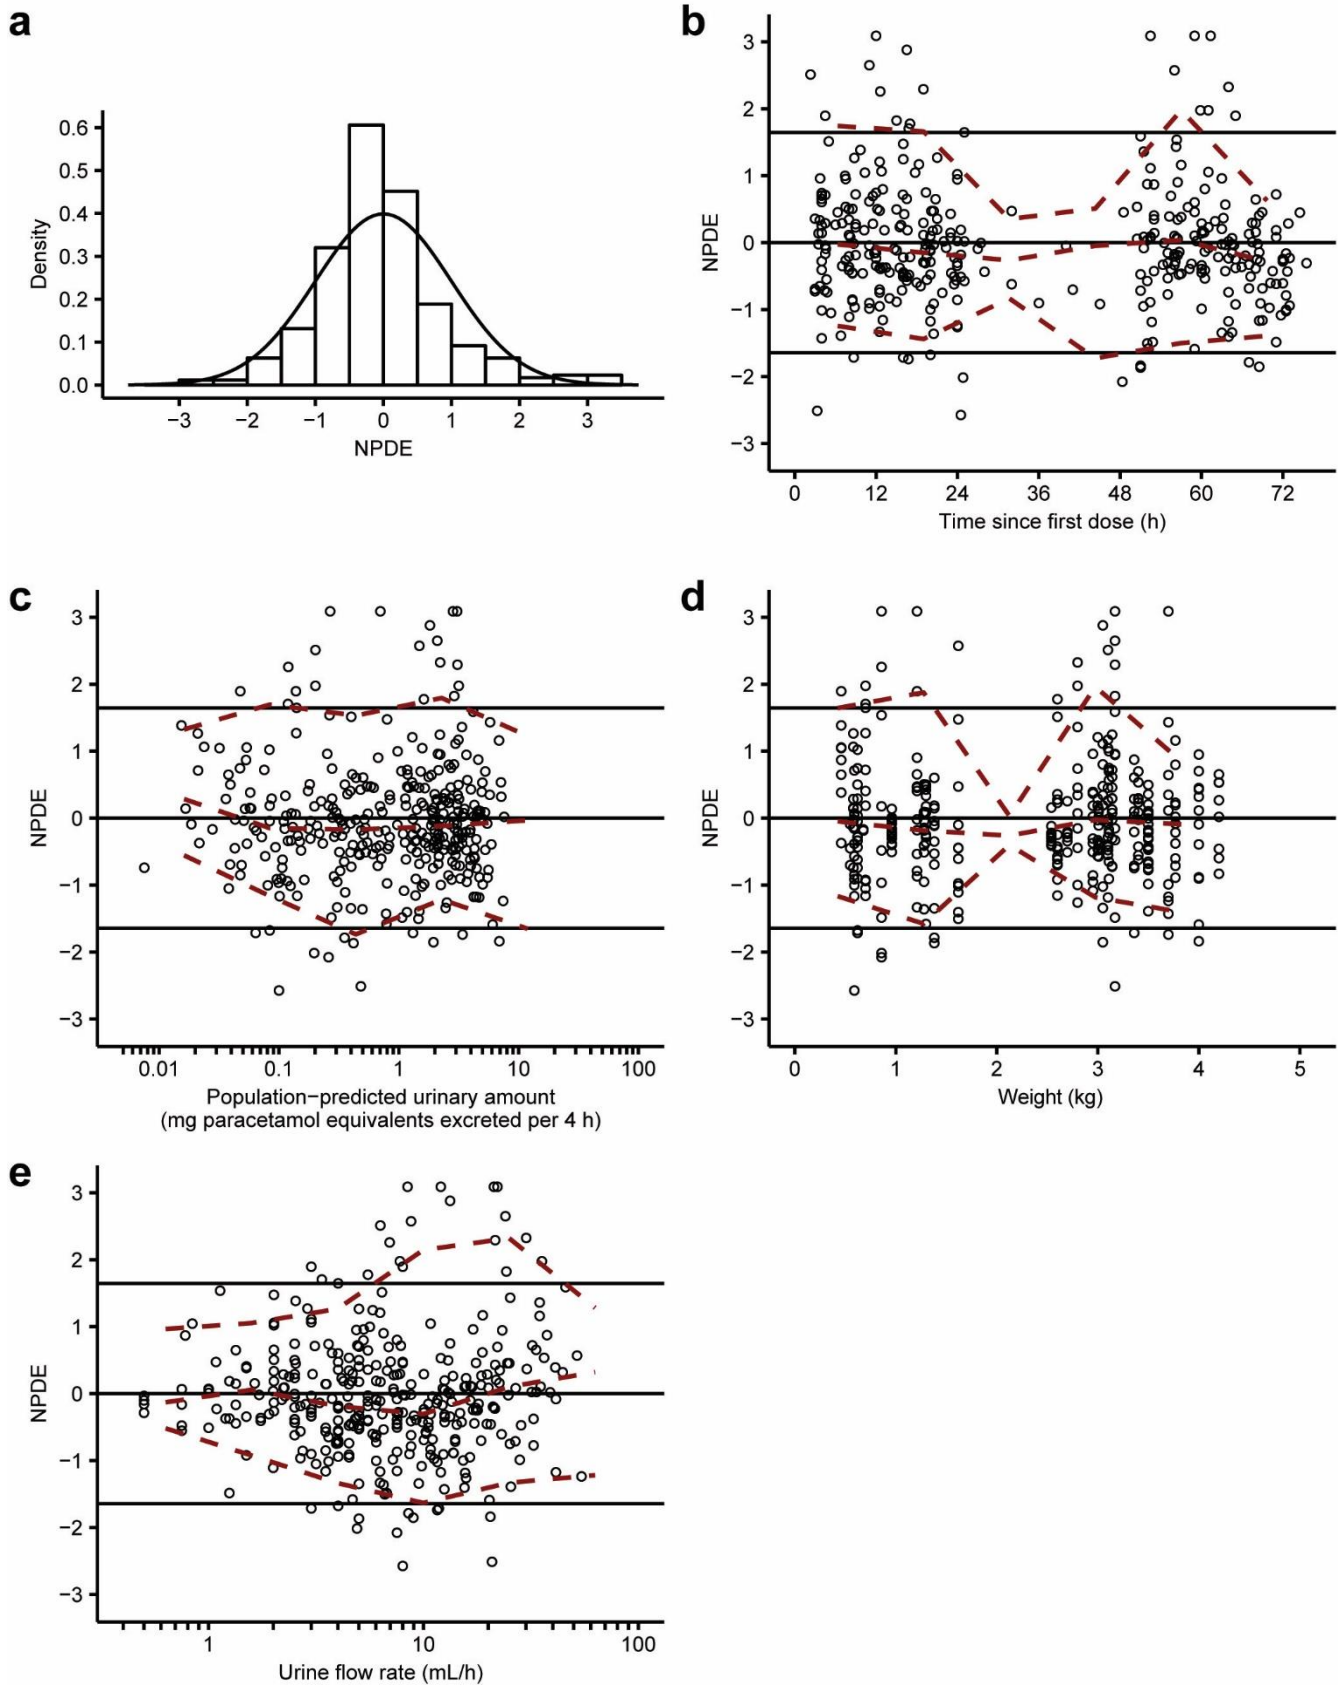

**Fig. S7** Plots of urinary paracetamol-glucuronide NPDEs for evaluation of the final model. Density histogram of NPDEs (a) with overlaid *solid black curve* depicting the standard normal distribution. NPDEs versus **b** time since first dose, **c** population-predicted amount, **d** weight, and **e** urine flow rate. In **b–e**, the *dashed red lines* depict the 5th, 50th, and 95th percentiles of the NPDEs and the *solid black lines* depict the 5th, 50th, and 95th percentiles of the standard normal distribution. *NPDEs* normalized prediction distribution errors



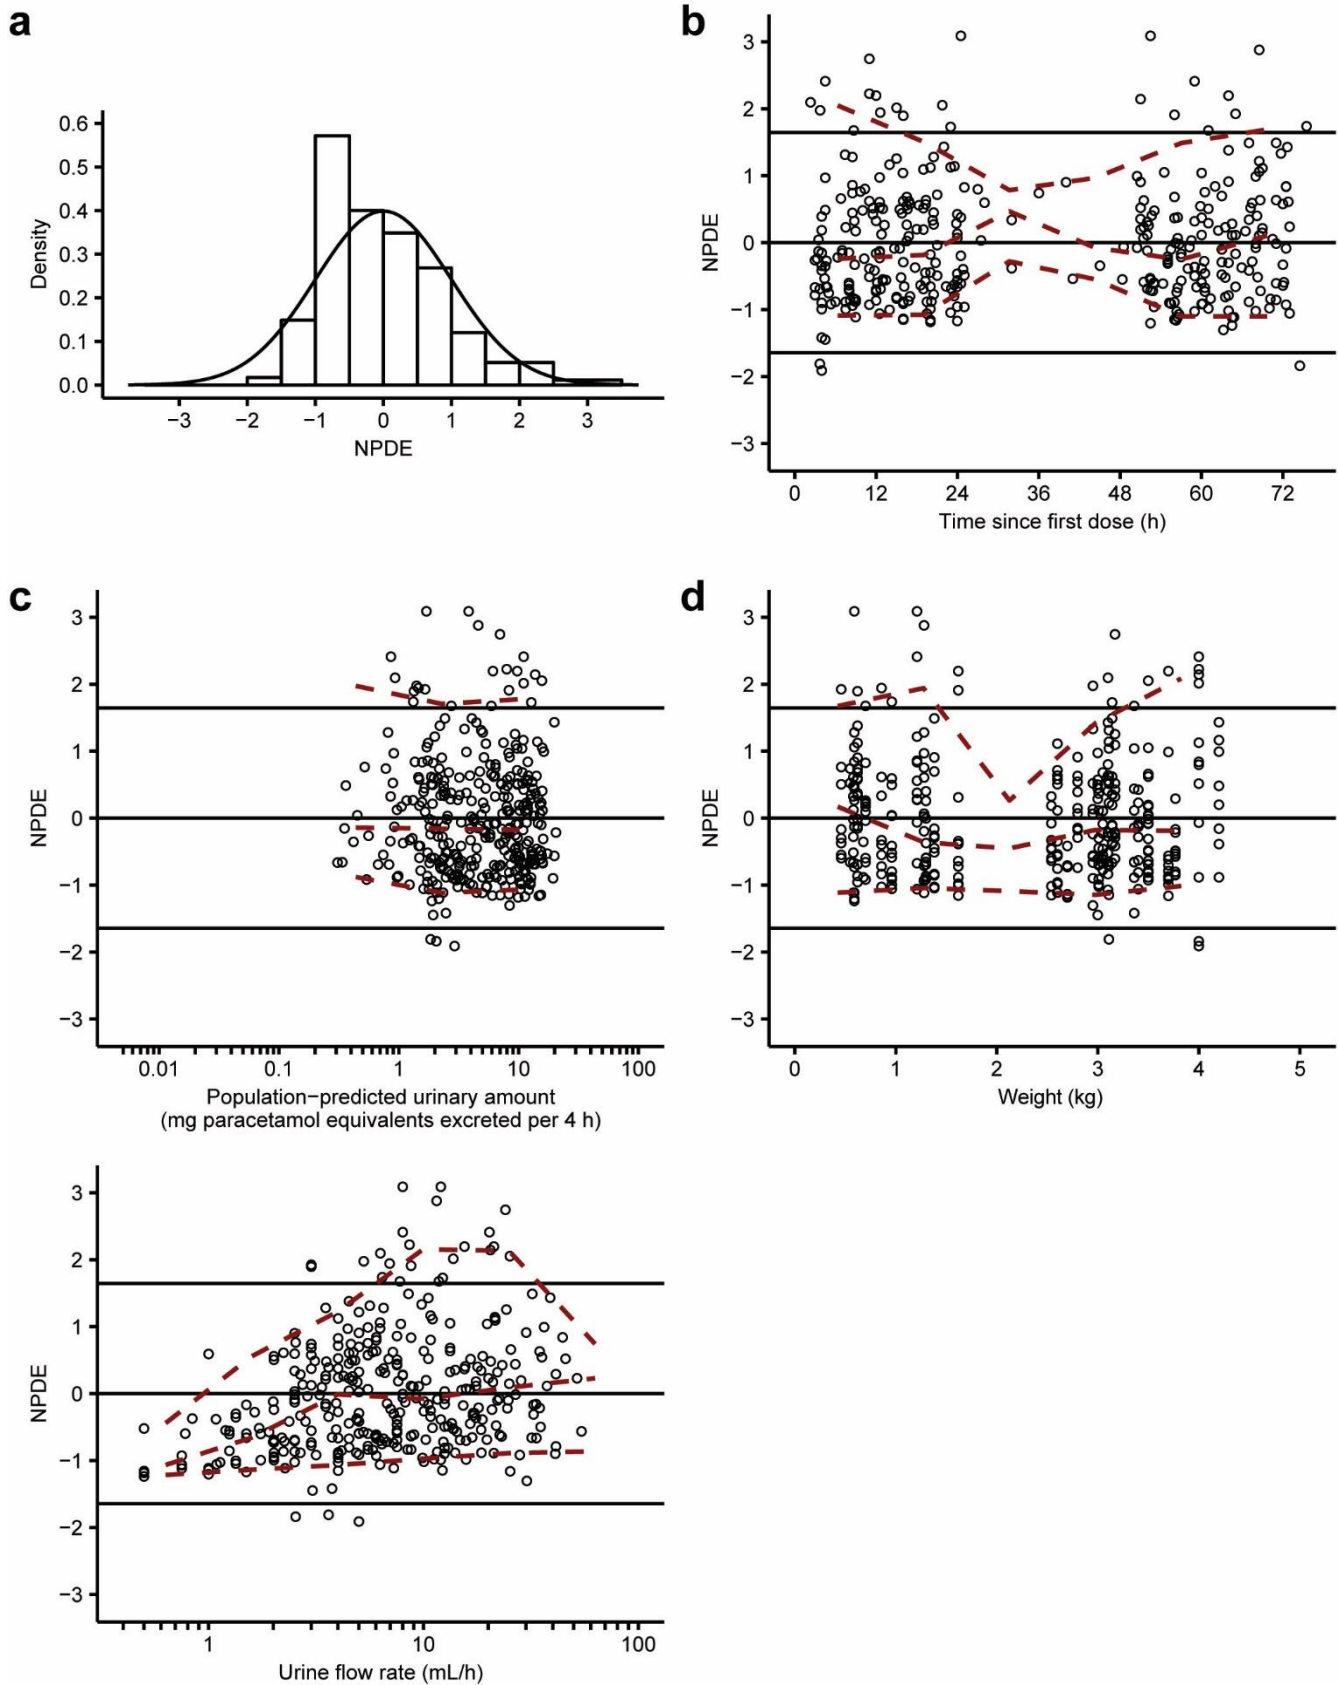

**Fig. S8** Plots of urinary paracetamol-sulfate NPDEs for evaluation of the final model. Density histogram of NPDEs (a) with overlaid *solid black curve* depicting the standard normal distribution. NPDEs versus **b** time since first dose, **c** population-predicted amount, **d** weight, and **e** urine flow rate. In **b–e**, the *dashed red lines* depict the 5th, 50th, and 95th percentiles of the NPDEs and the *solid black lines* depict the 5th, 50th, and 95th percentiles of the standard normal distribution. *NPDEs* normalized prediction distribution errors

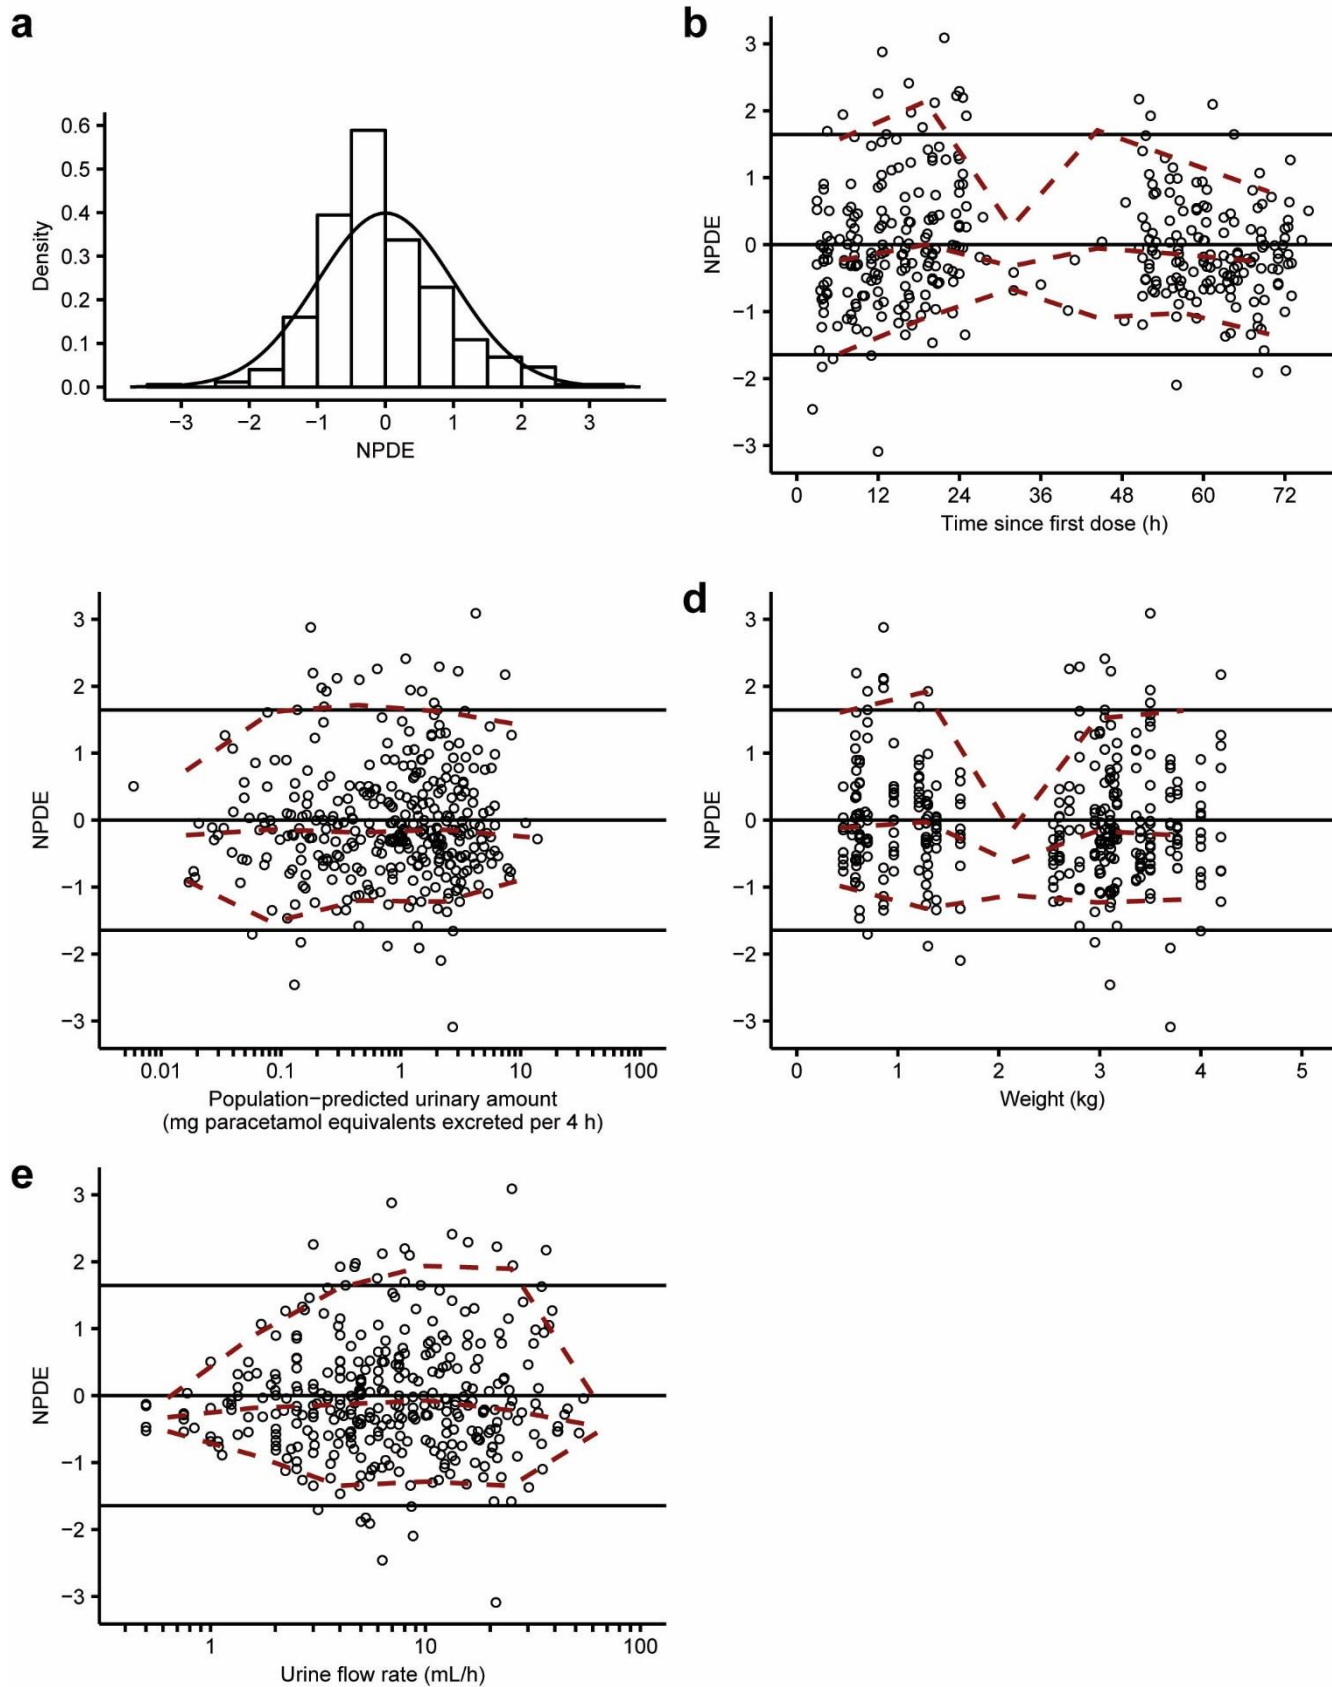

**Fig. S9** Plots of urinary oxidative pathway metabolite NPDEs for evaluation of the final model. Density histogram of NPDEs (a) with overlaid *solid black curve* depicting the standard normal distribution. NPDEs versus **b** time since first dose, **c** population-predicted amount, **d** weight, and **e** urine flow rate. In **b–e**, the *dashed red lines* depict the 5th, 50th, and 95th percentiles of the NPDEs and the *solid black lines* depict the 5th, 50th, and 95th percentiles of the standard normal distribution. *NPDEs* normalized prediction distribution errors

## Appendix: NONMEM 7.2 code for the final model

\$PROBLEM Paracetamol and metabolites in plasma and urine, Final model

\$INPUT

C ; For IGNORE  
ID ; Subject identification number  
TIME ; Time (h)  
AMT ; Dose (mg)  
RATE ; Drug infusion rate (coded as -2)  
DUR ; Drug infusion duration (h)  
EVID ; Event identification  
MDV ; Missing dependent variable  
CMT ; Compartment (1=paracetamol in plasma, 2=paracetamol-glucuronide in plasma,  
; 3=paracetamol-sulfate in plasma, 4=oxidative pathway metabolites in plasma,  
; 5=paracetamol-glucuronide in urine, 6=paracetamol-sulfate in urine,  
; 7=oxidative pathway metabolites in urine, 8=paracetamol in urine)  
DV ; Dependent variable (Concentration, mg paracetamol equivalents/L)  
L2 ; Level 2 data item for multivariate observations  
UVOL ; Urine sample volume (mL)  
UFLOW ; Average flow rate for each collected urine sample (mL/h)  
WT ; Patient body weight (kg)  
PNA ; Patient postnatal age (days)  
SURG ; Primary indication (1=postoperative analgesia, 0=procedural analgesia)

\$DATA FinalData.CSV IGNORE=C

\$SUBROUTINE ADVAN6 TOL=6

\$MODEL

COMP=(CENTPRNT) ; Central compartment for parent drug (paracetamol) in plasma  
COMP=(CENTGLUC) ; Central compartment for paracetamol-glucuronide in plasma  
COMP=(CENTSULF) ; Central compartment for paracetamol-sulfate in plasma  
COMP=(CENTOX) ; Central compartment for oxidative pathway metabolites in plasma  
COMP=(UGLUC INITIALOFF) ; Urinary compartment for paracetamol-glucuronide  
COMP=(USULF INITIALOFF) ; Urinary compartment for paracetamol-sulfate  
COMP=(UOX INITIALOFF) ; Urinary compartment for oxidative pathway metabolites  
COMP=(UPRNT INITIALOFF) ; Urinary compartment for parent drug (paracetamol)

\$PK

; Define values for centering covariates

MNWT = 2.3 ; Mean patient body weight (kg)  
MNPNA = 7.5 ; Mean patient postnatal age (days)  
MDUFLOW = 6.5 ; Median urine flow rate (mL/h)

; Define typical values with covariate effects

; Renal clearance for unchanged paracetamol  
TVCL1= THETA(1) \* (WT/MNWT)\*\*THETA(12) \* EXP(THETA(23) \* (UFLOW-MDUFLOW)) \* (1+THETA(29) \* SURG)

; Volume of distribution for paracetamol  
TVV1= THETA(2) \* (WT/MNWT)\*\*THETA(13)

; Formation clearance for paracetamol-glucuronide  
TVCL2= THETA(3) \* (WT/MNWT)\*\*THETA(14) \* (PNA/MNPNA)\*\*THETA(27)

; Volume of distribution for paracetamol-glucuronide  
TVV2= THETA(4) \* (WT/MNWT)\*\*THETA(15)

; Formation clearance for paracetamol-sulfate

```

TVCL3= THETA(5) * (WT/MNWT)**THETA(16)

; Volume of distribution for paracetamol-sulfate
TVV3= THETA(6) * (WT/MNWT)**THETA(17)

; Formation clearance for oxidative pathway metabolites
TVCL4= THETA(7) * (WT/MNWT)**THETA(18) * (PNA/MNPNA)**THETA(28)

; Volume of distribution for oxidative pathway metabolites
TVV4= THETA(8) * (WT/MNWT)**THETA(19)

; Renal clearance for paracetamol-glucuronide
TVCL5= THETA(9) * (WT/MNWT)**THETA(20) * EXP(THETA(24)*(UFLOW-MDUFLOW))

; Renal clearance for paracetamol-sulfate
TVCL6= THETA(10) * (WT/MNWT)**THETA(21) * EXP(THETA(25)*(UFLOW-MDUFLOW))

; Renal clearance for oxidative pathway metabolites
TVCL7= THETA(11) * (WT/MNWT)**THETA(22) * EXP(THETA(26)*(UFLOW-MDUFLOW))

; Define individual values
CL1 = TVCL1 * EXP(ETA(1)) ; Renal CL for unchanged paracetamol
V1 = TVV1 * EXP(ETA(2)) ; Vd for paracetamol
CL2 = TVCL2 * EXP(ETA(3)) ; Formation CL for paracetamol-glucuronide
V2 = TVV2 * EXP(ETA(4)) ; Vd for paracetamol-glucuronide
CL3 = TVCL3 * EXP(ETA(5)) ; Formation CL for paracetamol-sulfate
V3 = TVV3 * EXP(ETA(6)) ; Vd for paracetamol-sulfate
CL4 = TVCL4 * EXP(ETA(7)) ; Formation CL for oxidative pathway metabolites
V4 = TVV4 * EXP(ETA(8)) ; Vd for oxidative pathway metabolites
CL5 = TVCL5 * EXP(ETA(9)) ; Renal CL for paracetamol-glucuronide

; Define individual value for renal CL of paracetamol-sulfate
; and fix correlation in BSV for renal clearances of
; paracetamol-sulfate and paracetamol-glucuronide to 1
CL6 = TVCL6 * EXP(THETA(30)*ETA(9))

; Define individual value for renal CL of oxidative pathway metabolites
; and fix correlation in BSV for renal clearances of
; oxidative pathway metabolites and paracetamol-glucuronide to 1
CL7 = TVCL7 * EXP(THETA(31)*ETA(9))

D1 = DUR ; Define data item for drug infusion duration (h)

S1 = V1
S2 = V2
S3 = V3
S4 = V4
S5 = UVOL/1000
S6 = UVOL/1000
S7 = UVOL/1000
S8 = UVOL/1000

K18 = CL1 / V1
K12 = CL2 / V1
K13 = CL3 / V1
K14 = CL4 / V1
K25 = CL5 / V2
K36 = CL6 / V3
K47 = CL7 / V4

$DES

DADT(1) = -A(1) * (K18 + K12 + K13 + K14)

```

```
DADT(2) = A(1) * K12 - A(2) * K25
DADT(3) = A(1) * K13 - A(3) * K36
DADT(4) = A(1) * K14 - A(4) * K47
DADT(5) = A(2) * K25
DADT(6) = A(3) * K36
DADT(7) = A(4) * K47
DADT(8) = A(1) * K18
```

```
$ERROR
```

```
IPRED = F
```

```
; Define indicator variables so RUV can be estimated separately for each CMT
```

```
CT1 = 0
CT2 = 0
CT3 = 0
CT4 = 0
CT5 = 0
CT6 = 0
CT7 = 0
CT8 = 0
```

```
IF(CMT.EQ.1) CT1=1
IF(CMT.EQ.2) CT2=1
IF(CMT.EQ.3) CT3=1
IF(CMT.EQ.4) CT4=1
IF(CMT.EQ.5) CT5=1
IF(CMT.EQ.6) CT6=1
IF(CMT.EQ.7) CT7=1
IF(CMT.EQ.8) CT8=1
```

```
; Define proportional RUV for all compartments
```

```
PROPP = CT1*ERR(1) + CT2*ERR(2) + CT3*ERR(3) + CT4*ERR(4) ; plasma compartments
PROPU = CT5*ERR(5) + CT6*ERR(6) + CT7*ERR(7) + CT8*ERR(8) ; urinary compartments
PROPERR = 1 + PROPP + PROPU
```

```
; Define additive RUV for paracetamol-sulfate in plasma and urine
```

```
; and for paracetamol in urine
```

```
; And fix correlation in RUV for paracetamol-sulfate and paracetamol in urine to 1
```

```
ADDERR = CT3*ERR(9) + CT6*ERR(10) + CT8*(THETA(32)*ERR(10))
```

```
Y = IPRED * (PROPERR) + ADDERR
```

```
$ESTIMATION METHOD=1 INTERACTION PRINT=5 MAX=99999 NSIG=2 SIGL=6 NOABORT
```

```
; Define initial estimates
```

```
$THETA
```

```
( 0, 0.02, 1) ; CL1
( 0, 3, 15) ; V1
( 0, 0.05, 1) ; CL2
( 0, 1, 15) ; V2
( 0, 0.2, 2) ; CL3
( 0, 1, 15) ; V3
( 0, 0.06, 1) ; CL4
( 0, 3, 15) ; V4
( 0, 0.1, 2) ; CL5
( 0, 0.1, 2) ; CL6
( 0, 0.2, 2) ; CL7
(-1, 1, 5) ; WT on CL1
(-1, 1, 5) ; WT on V1
(-1, 1, 5) ; WT on CL2
```

```

(-1, 1, 5) ; WT on V2
(-1, 1, 5) ; WT on CL3
(-1, 1, 5) ; WT on V3
(-1, 1, 5) ; WT on CL4
(-1, 1, 5) ; WT on V4
(-1, 1, 5) ; WT on CL5
(-1, 1, 5) ; WT on CL6
(-1, 1, 5) ; WT on CL7
(-1, 0.02, 1) ; UFLOW on CL1
(-1, 0.02, 1) ; UFLOW on CL5
(-1, 0.02, 1) ; UFLOW on CL6
(-1, 0.02, 1) ; UFLOW on CL7
(-1, 1, 5) ; PNA on CL2
(-1, 1, 5) ; PNA on CL4
(-2, -0.5, 2) ; SURG on CL1
(1.5) ; Scale parameter between variances of renal CL for paracetamol-glucuronide
; and renal CL for paracetamol-sulfate (see Equations 5 and 6)
(1.2) ; Scale parameter between variances of renal CL for paracetamol-glucuronide
; and renal CL for oxidative pathway metabolites (see Equations 5 and 6)
(0.01) ; Scale parameter between variances of additive RUV for paracetamol in urine
; and additive RUV for paracetamol-sulfate in urine (see Equations 5 and 6)

```

\$OMEGA BLOCK(9)

```

0.3 ; CL1
0.01 0.3 ; V1
0.01 0.01 0.3 ; CL2
0.01 0.01 0.01 0.3 ; V2
0.01 0.01 0.01 0.01 0.3 ; CL3
0.01 0.01 0.01 0.01 0.01 0.3 ; V3
0.01 0.01 0.01 0.01 0.01 0.01 0.3 ; CL4
0.01 0.01 0.01 0.01 0.01 0.01 0.01 0.3 ; V4
0.01 0.01 0.01 0.01 0.01 0.01 0.01 0.01 0.3 ; CL5

```

```

; Proportional RUV for plasma compartments
; with covariance estimated for multivariate observations

```

\$\$SIGMA BLOCK(4)

```

0.1 ; plasma paracetamol
0.01 0.1 ; plasma paracetamol-glucuronide
0.01 0.01 0.1 ; plasma paracetamol-sulfate
0.01 0.01 0.01 0.1 ; plasma oxidative pathway metabolites

```

```

; Proportional RUV for urine compartments
; with covariance estimated for multivariate observations

```

\$\$SIGMA BLOCK(4)

```

0.4 ; urinary paracetamol-glucuronide
0.1 0.4 ; urinary paracetamol-sulfate
0.1 0.1 0.4 ; urinary oxidative pathway metabolites
0.1 0.1 0.1 0.4 ; urinary paracetamol

```

```

; Additive RUV

```

\$\$SIGMA

```

1.2 ; plasma paracetamol-sulfate
200 ; urinary paracetamol-sulfate

```
